# Supplementary material
Source: HighWire-hosted journal article supplement (https://bmjopen.bmj.com/content/7/1/e013538)
Supplement: inline-supplementary-material-2 [file inline-supplementary-material-2.pdf]

**Appendix 2: A short question guide for the selection of relevant studies based on inclusion criteria**

| No | Question                                                                           | Action                                    |
|----|------------------------------------------------------------------------------------|-------------------------------------------|
| 1  | Did the study use any of the eligible study design?                                | Yes, move to next question<br>No, exclude |
| 2  | Did the study involve learners/schoolchildren aged 6-12 years?                     | Yes, move to next question<br>No, exclude |
| 3  | Were the study participants residing in any of the African countries?              | Yes, move to next question<br>No, exclude |
| 4  | Did the study report overweight and/ obesity?                                      | Yes, move to next question<br>No, exclude |
| 5  | Were objective measures of body composition used?                                  | Yes, move to next question<br>No, exclude |
| 6. | Were any of the internationally accepted cut-offs for overweight and obesity used? | Yes, include study<br>No, exclude         |
