# Supplementary material
Source: HighWire-hosted journal article supplement (https://bmjopen.bmj.com/content/7/1/e013538)
Supplement: inline-supplementary-material-3 [file inline-supplementary-material-3.pdf]

### Appendix 3: Modified Downs and Black checklist for assessing quality of studies

| No.               | Question                                                                                                                                                    | Yes = 1 | No = 0 |
|-------------------|-------------------------------------------------------------------------------------------------------------------------------------------------------------|---------|--------|
| <b>Reporting</b>  |                                                                                                                                                             |         |        |
| 1.                | Is the hypothesis/aim/objective of the study clearly described?                                                                                             |         |        |
| 2.                | Are the main outcomes of the study clearly described?                                                                                                       |         |        |
| 3                 | Are the characteristics of the patients included in the study clearly described?                                                                            |         |        |
| 6                 | Are the main findings of the study clearly described?                                                                                                       |         |        |
| 7                 | Does the study provide estimates of the random variability in the data for the main outcomes?                                                               |         |        |
| 10                | Have actual probability values been reported (e.g. 0.035 rather than $<0.05$ ) for the main outcomes except where the probability value is less than 0.001? |         |        |
| External validity |                                                                                                                                                             |         |        |
| 11                | Were the subjects asked to participate in the study representative of the entire population from which they were recruited?                                 |         |        |
| 12                | Were those subjects who were prepared to participate representative of the entire population from which they were recruited?                                |         |        |
| Internal validity |                                                                                                                                                             |         |        |
| 18                | Were the statistical tests used to assess the main outcomes appropriate?                                                                                    |         |        |
| 20                | Were the main outcome measures used accurate (valid and reliable)?                                                                                          |         |        |
